# Supplementary material
Source: PubMed Central journal article supplement (PMC10598994)
Supplement: NIHMS1933715-supplement-1.pdf [file NIHMS1933715-supplement-1.pdf]

**Supplementary table 1****Variants found in the reference database ClinVar for 25 DSD genes.**

Variants with non-synonymous changes, for which a phenotype was indicated as linked to a DSD condition, were exported from ClinVar on the date indicated in each tab. Not included were: contiguous gene deletions involving a large number of genes, as causation could not be attributed to a particular gene; variants for which no phenotypic condition was indicated; and variants linked to non-DSD conditions. Features and limitations of the variants list are indicated in each tab below the list.
